# Supplementary material
Source: publisher figshare collection journal article supplement (https://future-science-group.figshare.com/ndownloader/files/34326656)
Supplement: Supplementary file 1 [file 34326656]

## Sheet: supplementary1
Entrez Gene ID	Gene Symbol	pathway	probe_id
10036	CHAF1A	Others;	cg24085258
10038	PARP2	HDR;BER;	cg24595957;cg15078479
10039	PARP3	BER;NHEJ;	cg23013392;cg12554573
10111	RAD50	HDR;NHEJ;	cg24974130;cg21935083
1022	CDK7	NER;	cg26324201;cg25112044
10286	BCAS2	Others;	cg23018891;cg19234509
10459	MAD2L2	FA;TLS;	cg17189494;cg07789904
10524	KAT5	HDR;	cg22048492;cg18896539
10714	POLD3	HDR;BER;NER;MMR;	cg27076799;cg08839620
10912	GADD45G	Others;	cg21912567;cg20070077	Others
10933	MORF4L1	Others;	cg14426682;cg03589001
10973	ASCC3	DR;	cg10869069;cg03664139
11044	POLS	BER;TLS;	cg20149766;cg09576882
11073	TOPBP1	Others;	cg17260449;cg02387613
1111	CHEK1	Others;	cg03474731;cg00554702
11144	DMC1	HDR;	cg20120491;cg16959972
11200	CHEK2	Others;	cg22585269;cg16189954;cg01875775
11201	POLI	TLS;	cg02447314
11277	TREX1	Others;	cg27575501;cg02922563
11284	PNKP	BER;NHEJ;	cg04314463
113510	HELQ	HDR;FA;	cg22774012;cg22541143
116028	RMI2	HDR;FA;	cg19346899;cg07715894
1161	ERCC8	NER;	cg16928795;cg11649654
1196	CLK2	Others;	cg26771217;cg04498032
126074	SWSAP1	HDR;	cg12754733;cg07569069
1263	PLK3	Others;	cg27287808;cg00904574
136647	MPLKIP	Others;	cg22284975;cg08136893
142	PARP1	HDR;BER;NHEJ;	cg17661881;cg04960271
143	PARP4	BER;	cg09546332;cg02943497
144715	RAD9B	Others;	cg11175477;cg00278366
146956	EME1	HDR;	cg20572838;cg09822907
151987	PPP4R2	HDR;	cg21051086;cg20540428
1642	DDB1	NER;	cg21043754;cg03160637
1643	DDB2	NER;	cg26408937;cg19486271
1647	GADD45A	Others;	cg07000785;cg04718306
165918	RNF168	NHEJ;	cg16185365
1791	DNTT	NHEJ;	cg27157038;cg24949488
1854	DUT	Others;	cg17037924;cg16016951
197370	NSMCE1	HDR;	cg12391783;cg06919067
199990	FAAP20	FA;	cg24649713;cg05940463
200558	APLF	BER;	cg06538003
201254	STRA13	FA;	cg16375728;cg10645943
201299	RDM1	HDR;	cg16574065;cg06481786
2067	ERCC1	HDR;NER;FA;	cg17378989;cg15911500
2068	ERCC2	NER;	cg06245154;cg04878842
2071	ERCC3	NER;	cg09788866
2072	ERCC4	NER;FA;	cg24091698;cg10784067
2073	ERCC5	NER;	cg13057891;cg07177755
2074	ERCC6	NER;	cg14343062;cg01465325
2175	FANCA	FA;	cg24800887;cg19216839
2176	FANCC	FA;	cg06202984;cg04021421
2177	FANCD2	FA;	cg24596576;cg02579736
2178	FANCE	FA;	cg17803089;cg03030757
2188	FANCF	FA;	cg03822011;cg03794550;cg02300906;cg02235880;cg00908551;cg00146096
2189	FANCG	FA;	cg05293216;cg03563403
221120	ALKBH3	DR;	cg22637507;cg17838765
2237	FEN1	HDR;BER;	cg22704775;cg18009798;cg15963971;cg14086033;cg11730100;cg03114244;cg02005336;cg01447420
22909	FAN1	FA;	cg22443330;cg01939479
23137	SMC5	HDR;	cg21740204
23583	SMUG1	BER;	cg24488435;cg11887234
23626	SPO11	HDR;	cg26645834;cg13888886
252969	NEIL2	BER;	cg14329976;cg00873037
2547	XRCC6	NHEJ;	cg02169098
25788	RAD54B	HDR;	cg27091703;cg15995002
27030	MLH3	MMR;	cg24482053;cg23407670
27339	PRPF19	Others;	cg25575359;cg00778920
27343	POLL	BER;NHEJ;	cg18834029
286053	NSMCE2	HDR;	cg20379012;cg05440218
29089	UBE2T	FA;	cg15173196;cg01918706
2956	MSH6	MMR;	cg07652213;cg02905881
2966	GTF2H2	NER;	cg05095674
2967	GTF2H3	NER;	cg01110312
2968	GTF2H4	NER;	cg23142900;cg00296685
3014	H2AFX	HDR;	cg07697569;cg01924993
3146	HMGB1	BER;MMR;	cg11047295;cg09203961
3148	HMGB2	BER;	cg25086702;cg13515674
328	APEX1	BER;	cg22438324;cg21337430
3280	HES1	FA;	cg25466368;cg06414605
3364	HUS1	Others;	cg14171882;cg12034229
3417	IDH1	Others;	cg24324379;cg07915542
348654	GEN1	HDR;	cg08894534;cg03580351
353497	POLN	TLS;	cg13450057
378708	APITD1	FA;	cg09242541
3978	LIG1	HDR;BER;NER;MMR;	cg13668397;cg09594841
3980	LIG3	BER;	cg24041995;cg01151686
3981	LIG4	NHEJ;	cg08216792;cg07403350
4255	MGMT	DR;	cg27056559;cg26201213;cg25946389;cg24580056;cg20778669;cg20537325;cg19706602;cg19680672;cg18488970;cg17686260;cg16698623;cg14129786;cg12981137;cg12434587;cg12040555;cg10333959;cg10036895;cg07638938;cg07453748;cg04473030;cg03271907;cg02941816;cg02803836;cg02381948;cg02330106;cg00904483
4292	MLH1	MMR;	cg24607398;cg18320188;cg13846866;cg10990993;cg03956628;cg02279071
4331	MNAT1	NER;	cg14834436
4350	MPG	BER;	cg25473396;cg16003913
4361	MRE11A	HDR;NHEJ;	cg23759214;cg20815063
4436	MSH2	MMR;	cg17129141;cg11311499
4437	MSH3	MMR;	cg10180697;cg08244028
4521	NUDT1	NP;	cg21060429
4595	MUTYH	BER;	cg09360654
4683	NBN	HDR;NHEJ;	cg17724365;cg07084161
472	ATM	Others;	cg24027342;cg22477592;cg18457775;cg03165700;cg01800843
4913	NTHL1	BER;	cg19837824;cg05243909
4968	OGG1	BER;	cg25415932;cg15357639
50484	RRM2B	Others;	cg07125123;cg04230869
5111	PCNA	HDR;BER;NER;MMR;TLS;	cg04562739;cg02689825
51455	REV1	TLS;	cg13754949;cg12554819
51567	TDP2	Others;	cg23020402;cg06171242
51720	UIMC1	HDR;	cg18546419;cg06720424
51750	RTEL1	HDR;	cg24549085;cg05358404
5187	PER1	Others;	cg16545079;cg01980637
5378	PMS1	MMR;	cg26454191
5395	PMS2	MMR;	cg10485724;cg04317940
54107	POLE3	BER;NER;	cg16367027;cg01481976
5422	POLA1	Others;	cg14520892
5423	POLB	BER;NHEJ;TLS;	cg20264731;cg11415932
5424	POLD1	HDR;BER;NER;MMR;	cg19063397;cg16923271
5425	POLD2	HDR;BER;NER;MMR;	cg21123509;cg13916931
5426	POLE	BER;NER;	cg02501984;cg00630583
5428	POLG	Others;	cg22187094;cg05024638
5429	POLH	HDR;TLS;	cg07857181;cg06132324
545	ATR	Others;	cg20636078;cg11458642
54617	INO80	HDR;	cg06380007
54780	NSMCE4A	HDR;	cg07011445;cg05610379
54840	APTX	BER;	cg23234510;cg22667787
55010	PARPBP	HDR;	cg05727959;cg02806658
55120	FANCL	FA;	cg19679281;cg10174864
55183	RIF1	NHEJ;Others;	cg08475827;cg06191203
55247	NEIL3	BER;	cg13743031;cg09475757
55270	NUDT15	NP;	cg12906740;cg11473104
5531	PPP4C	HDR;	cg21742836;cg11970301
55775	TDP1	BER;	cg24023606;cg14454278
5591	PRKDC	NHEJ;	cg23109897
56160	NSMCE3	HDR;	cg17186444;cg01665633
56655	POLE4	BER;NER;	cg21954994;cg15091337
56852	RAD18	TLS;	cg26640549;cg04765422
56916	SMARCAD1	HDR;	cg26226968;cg02827112
5728	PTEN	Others;	cg21573601;cg21480743;cg20849549;cg17489897;cg16687447;cg08859916;cg04738091;cg01228636
57718	PPP4R4	HDR;	cg10314752;cg09173897
57804	POLD4	HDR;BER;NER;MMR;	cg09706243;cg02066887
580	BARD1	HDR;FA;	cg12091944
5810	RAD1	Others;	cg06466479
5883	RAD9A	Others;	cg03750407;cg01787047
5884	RAD17	Others;	cg12460105
5886	RAD23A	NER;	cg23250700;cg11913104
5887	RAD23B	NER;	cg25483839;cg14919562
5888	RAD51	HDR;FA;	cg21465754;cg04662451
5889	RAD51C	HDR;FA;	cg19208681;cg14837411
5890	RAD51B	HDR;	cg09424925;cg08158860
5892	RAD51D	HDR;	cg16296356;cg02740947
5893	RAD52	HDR;	cg15612927;cg10377764
5932	RBBP8	HDR;	cg21518938;cg11840168
5965	RECQL	HDR;	cg20701850;cg02744459
5980	REV3L	TLS;	cg25136687;cg14634336
5981	RFC1	HDR;BER;NER;MMR;	cg20166783;cg12062995
5982	RFC2	HDR;BER;NER;MMR;	cg03098361;cg00955230
5983	RFC3	HDR;BER;NER;MMR;	cg24254120;cg19932177
5984	RFC4	HDR;BER;NER;MMR;	cg20872461;cg12583908
5985	RFC5	HDR;BER;NER;MMR;	cg18627459;cg05227963
6047	RNF4	Others;	cg16474684;cg07651857
6117	RPA1	HDR;NER;MMR;	cg09901733
6118	RPA2	HDR;NER;MMR;	cg11542231;cg05871607
6119	RPA3	HDR;NER;MMR;	cg26322315
6240	RRM1	NP;	cg18678763;cg04680304
6241	RRM2	NP;	cg18623836;cg02237186
641	BLM	HDR;FA;	cg07973395;cg01994513
6419	SETMAR	Others;	cg15384599;cg15232450
64210	MMS19	NER;	cg14175593;cg09773756
64421	DCLRE1C	NHEJ;	cg07903860;cg04785461
64782	AEN	Others;	cg26561254;cg04572898
64789	EXO5	Others;	cg26776069;cg25568243
64976	MRPL40	Others;	cg23957084;cg17881637
6596	HLTF	TLS;	cg26151310;cg21089667;cg04836786;cg02059813
6597	SMARCA4	Others;	cg17747332;cg12411068
6599	SMARCC1	Others;	cg24832353;cg16250355
6659	SOX4	Others;	cg14499797
672	BRCA1	HDR;FA;	cg27383744;cg19531713;cg19088651;cg14048487;cg11964474;cg08993267;cg07054526;cg06973652;cg04658354
675	BRCA2	HDR;FA;	cg27253386;cg12836863
6917	TCEA1	NER;	cg12737801;cg01677098
6921	TCEB1	NER;	cg23526055;cg05751979
6923	TCEB2	NER;	cg07059052;cg06090630
6924	TCEB3	NER;	cg22198425;cg02907300
6996	TDG	BER;	cg11207379;cg03923277
7157	TP53	Others;	cg22175811;cg11519508
7158	TP53BP1	HDR;NHEJ;	cg12032620;cg09020461
7272	TTK	Others;	cg22244118;cg02966329
7298	TYMS	Others;	cg23384185;cg18419020
7320	UBE2B	TLS;	cg08513100;cg00943950
7334	UBE2N	TLS;	cg18116253;cg11957880
7336	UBE2V2	TLS;	cg25612480;cg14473123
7374	UNG	BER;	cg22978941;cg01442833
7398	USP1	FA;TLS;	cg16235860
7465	WEE1	Others;	cg25876934;cg16120811
7486	WRN	HDR;BER;	cg10709021;cg09945801
7507	XPA	NER;	cg07965714;cg06383088
7508	XPC	NER;	cg18946802;cg13604223
7515	XRCC1	BER;	cg15167433;cg01880404
7516	XRCC2	HDR;FA;	cg23126915
7517	XRCC3	HDR;	cg13042487
7518	XRCC4	NHEJ;	cg25243721;cg23248587
7520	XRCC5	NHEJ;	cg21404906;cg16579354
7529	YWHAB	Others;	cg22799917;cg07064406
7531	YWHAE	Others;	cg25299176;cg11816577
7532	YWHAG	Others;	cg12730381;cg06186973
79035	NABP2	Others;	cg25245322;cg22591065;cg17709466;cg14816013;cg11722639;cg08409225;cg02153528
79184	BRCC3	Others;	cg25893483
79661	NEIL1	BER;	cg12978308;cg12600197
79677	SMC6	HDR;	cg18220560
7979	SHFM1	HDR;	cg17348931;cg15781316
79840	NHEJ1	NHEJ;	cg20972416;cg04587910
80010	RMI1	HDR;FA;	cg27305895;cg22807823
80198	MUS81	HDR;	cg15883761;cg04042106
8065	CUL5	NER;	cg07979752;cg00047050
83932	SPRTN	Others;	cg15459773;cg04636557
83990	BRIP1	HDR;FA;	cg12435611;cg05986149
84142	FAM175A	NHEJ;	cg02918483;cg02782630
8438	RAD54L	HDR;	cg17079378;cg03262773
84464	NA	NA	cg04211818
8451	CUL4A	NER;	cg16155588
8452	CUL3	NER;	cg09509863;cg07310661
84901	NFATC2IP	HDR;	cg26962295;cg23517548
8505	PARG	HDR;BER;NHEJ;	cg25683904
8846	ALKBH1	BER;	cg20385229
8924	HERC2	Others;	cg13914438;cg11412582
8930	MBD4	BER;	cg19235307;cg18303397
8940	TOP3B	HDR;FA;	cg25371038;cg14242091
902	CCNH	NER;	cg14452392;cg09299307
9025	RNF8	NHEJ;	cg06777581;cg01907837
91442	FAAP24	FA;	cg21912241;cg16174234
9156	EXO1	MMR;	cg20629097;cg07639959
9400	RECQL5	HDR;	cg03660451
9401	RECQL4	HDR;	cg21092687;cg15857475
9577	BRE	FA;	cg18712919
9656	MDC1	Others;	cg12814525;cg10277195
993	CDC25A	Others;	cg24031606;cg02449978
9937	DCLRE1A	Others;	cg04281204
994	CDC25B	Others;	cg08770869;cg03524627
995	CDC25C	Others;	cg22748850;cg14784788
9978	RBX1	NER;	cg14789928;cg03614664
998	CDC5L	Others;	cg16268051
9989	PPP4R1	HDR;	cg14797438;cg03862540
Base Excision Repair (BER)
Nucleotide Excision Repair (NER) - includes TC-NER and GC-NER
Mismatch Repair (MMR)
Fanconi Anemia (FA)
Homology dependent recombination (HDR)
Non-homologous End Joining (NHEJ)
Direct Repair (DR)
Translesion Synthesis (TLS)
Nucleotide pools (NP)
